# Supplementary material for: Wild Bird Surveillance in the Gauteng Province of South Africa during the High-Risk Period for Highly Pathogenic Avian Influenza Virus Introduction
Source: MDPI journal article supplement (doi:10.3390/v14092027), 2022-09-13
Supplement: s1 [file s1]

**Supplemental Table S1.** Samples analysed in the study and summary of results

| Sample #  | Sampling date | Location                 | Predominant species observed | Real-time RT-PCR results (Ct value) |                  |              | Subtype <sup>a</sup>           |
|-----------|---------------|--------------------------|------------------------------|-------------------------------------|------------------|--------------|--------------------------------|
|           |               |                          |                              | IAV group                           | H5 subtype       | H9 subtype   |                                |
| D1725-2   | 03-Feb-22     | Rooikraal, Heidelberg    | SI, EG, WFD                  | not detected                        |                  |              |                                |
| D1725-1   | 03-Feb-22     | Rooikraal, Heidelberg    | SI, EG, WFD                  | Positive (37.06)                    | not detected     | not detected |                                |
| D1721-1   | 04-Feb-22     | Grootvaly, Springs       | SI, EG, WFD                  | Positive (38.47)                    | not detected     | not detected |                                |
| D1726-2   | 04-Feb-22     | Grootvaly, Springs       | SI, EG, WFD                  | not detected                        |                  |              |                                |
| BA101     | 08-Feb-22     | Bon Accord Dam, Pretoria | EG, SI, EWS                  | not detected                        |                  |              |                                |
| BA102     | 08-Feb-22     | Bon Accord Dam, Pretoria | EG, SI, EWS                  | not detected                        |                  |              |                                |
| BA103     | 08-Feb-22     | Bon Accord Dam, Pretoria | EG, SI, EWS                  | Positive (39.57)                    | not detected     | not detected |                                |
| BA104     | 08-Feb-22     | Bon Accord Dam, Pretoria | EG, SI, EWS                  | Positive (39.24)                    | not detected     | not detected |                                |
| BA105     | 08-Feb-22     | Bon Accord Dam, Pretoria | EG, SI, EWS                  | not detected                        |                  |              |                                |
| BA106     | 08-Feb-22     | Bon Accord Dam, Pretoria | EG, SI, EWS                  | not detected                        |                  |              |                                |
| BA107     | 08-Feb-22     | Bon Accord Dam, Pretoria | EG, SI, EWS*                 | Positive (18.53)                    | Positive (17.74) | not detected | <b>H5N1 HPAT<sup>b,c</sup></b> |
| BA108     | 08-Feb-22     | Bon Accord Dam, Pretoria | EG, SI, EWS                  | not detected                        |                  |              |                                |
| BA109     | 08-Feb-22     | Bon Accord Dam, Pretoria | EG, SI, EWS                  | Positive (37.16)                    | not detected     | not detected |                                |
| BA110     | 08-Feb-22     | Bon Accord Dam, Pretoria | EG, SI, EWS                  | not detected                        |                  |              |                                |
| BA111     | 08-Feb-22     | Bon Accord Dam, Pretoria | EG, SI, EWS                  | Positive (37.43)                    | not detected     | not detected |                                |
| BA112     | 08-Feb-22     | Bon Accord Dam, Pretoria | EG, SI, EWS                  | not detected                        |                  |              |                                |
| BA113     | 08-Feb-22     | Bon Accord Dam, Pretoria | EG, SI, EWS                  | not detected                        |                  |              |                                |
| BA114     | 08-Feb-22     | Bon Accord Dam, Pretoria | EG, SI, EWS                  | Positive (36.79)                    | not detected     | not detected |                                |
| BA115     | 08-Feb-22     | Bon Accord Dam, Pretoria | EG, SI, EWS                  | not detected                        |                  |              |                                |
| BA116     | 08-Feb-22     | Bon Accord Dam, Pretoria | EG, SI, EWS                  | not detected                        |                  |              |                                |
| BA117     | 08-Feb-22     | Bon Accord Dam, Pretoria | EG, SI, EWS                  | not detected                        |                  |              |                                |
| LC01      | 09-Feb-22     | Loch Vaal, Vereeniging   | EG                           | not detected                        |                  |              |                                |
| LC02      | 09-Feb-22     | Loch Vaal, Vereeniging   | EG                           | Positive (37.02)                    | not detected     | not detected |                                |
| IRN22-001 | 10-Feb-22     | Irene, Centurion         | EG, YBD, SI, HI              | Positive (35.87)                    | not detected     | not detected | <b>H8Nx</b>                    |
| IRN22-002 | 10-Feb-22     | Irene, Centurion         | EG, YBD, SI, HI              | Positive (36.25)                    | not detected     | not detected |                                |
| IRN22-003 | 10-Feb-22     | Irene, Centurion         | EG, YBD, SI, HI              | Positive (37.28)                    | not detected     | not detected |                                |
| IRN22-004 | 10-Feb-22     | Irene, Centurion         | EG, YBD, SI, HI              | not detected                        |                  |              |                                |

|           |           |                          |                 |                  |              |                  |                         |
|-----------|-----------|--------------------------|-----------------|------------------|--------------|------------------|-------------------------|
| IRN22-005 | 10-Feb-22 | Irene, Centurion         | EG, YBD, SI, HI | Positive (34.44) | not detected | not detected     | <b>H8Nx</b>             |
| IRN22-006 | 10-Feb-22 | Irene, Centurion         | EG, YBD, SI, HI | Positive (36.74) | not detected | not detected     |                         |
| IRN22-007 | 10-Feb-22 | Irene, Centurion         | EG, YBD, SI, HI | Positive (37.66) | not detected | not detected     |                         |
| IRN22-008 | 10-Feb-22 | Irene, Centurion         | EG, YBD, SI, HI | not detected     |              |                  |                         |
| IRN22-009 | 10-Feb-22 | Irene, Centurion         | EG, YBD, SI, HI | Positive (37.36) | not detected | not detected     |                         |
| IRN22-010 | 10-Feb-22 | Irene, Centurion         | EG, YBD, SI, HI | Positive (36.15) | not detected | not detected     | <b>H8Nx</b>             |
| IRN22-011 | 10-Feb-22 | Irene, Centurion         | EG, YBD, SI, HI | Positive (36.6)  | not detected | not detected     |                         |
| IRN22-012 | 10-Feb-22 | Irene, Centurion         | EG, YBD, SI, HI | Positive (37.08) | not detected | not detected     |                         |
| IRN22-013 | 10-Feb-22 | Irene, Centurion         | EG, YBD, SI, HI | Positive (35.06) | not detected | not detected     | <b>H8Nx</b>             |
| ZL103     | 11-Feb-22 | Zoo Lake, Johannesburg   | EG, SI          | not detected     |              |                  |                         |
| ZL104     | 11-Feb-22 | Zoo Lake, Johannesburg   | EG, SI          | not detected     |              |                  |                         |
| ZL105     | 11-Feb-22 | Zoo Lake, Johannesburg   | EG, SI          | not detected     |              |                  |                         |
| ZL106     | 11-Feb-22 | Zoo Lake, Johannesburg   | EG, SI          | not detected     |              |                  |                         |
| ZL107     | 11-Feb-22 | Zoo Lake, Johannesburg   | EG, SI          | Positive (35.35) | not detected | not detected     |                         |
| ZL108     | 11-Feb-22 | Zoo Lake, Johannesburg   | EG, SI          | not detected     |              |                  |                         |
| ZL109     | 11-Feb-22 | Zoo Lake, Johannesburg   | EG, SI          | Positive (36.22) | not detected | not detected     |                         |
| ZL110     | 11-Feb-22 | Zoo Lake, Johannesburg   | EG, SI          | Positive (37.21) | not detected | not detected     |                         |
| ZL111     | 11-Feb-22 | Zoo Lake, Johannesburg   | EG, SI          | not detected     |              |                  |                         |
| ZL112     | 11-Feb-22 | Zoo Lake, Johannesburg   | EG, SI          | Positive (35.82) | not detected | not detected     |                         |
| ZL113     | 11-Feb-22 | Zoo Lake, Johannesburg   | EG, SI          | not detected     |              |                  |                         |
| ZL114     | 11-Feb-22 | Zoo Lake, Johannesburg   | EG, SI          | not detected     |              |                  |                         |
| ZL115     | 11-Feb-22 | Zoo Lake, Johannesburg   | EG, SI          | not detected     |              |                  |                         |
| ZL116     | 11-Feb-22 | Zoo Lake, Johannesburg   | EG, SI          | not detected     |              |                  |                         |
| ZL117     | 11-Feb-22 | Zoo Lake, Johannesburg   | EG, SI          | Positive (26.84) | not detected | Positive (24.71) | <b>H9N2<sup>b</sup></b> |
| ZL118     | 11-Feb-22 | Zoo Lake, Johannesburg   | EG, SI          | Positive (27.55) | not detected | Positive (25.17) | <b>H9N2<sup>b</sup></b> |
| ZL119     | 11-Feb-22 | Zoo Lake, Johannesburg   | EG, SI          | Positive (35.35) | not detected | Positive (35.85) | <b>H9N2</b>             |
| ZL120     | 11-Feb-22 | Zoo Lake, Johannesburg   | EG, SI          | Positive (36.95) | not detected | not detected     |                         |
| ZL121     | 11-Feb-22 | Zoo Lake, Johannesburg   | EG, SI          | Positive (24.30) | not detected | Positive (24.48) | <b>H9N2<sup>b</sup></b> |
| ZL122     | 11-Feb-22 | Zoo Lake, Johannesburg   | EG, SI          | not detected     |              |                  |                         |
| BA 201    | 15-Feb-22 | Bon Accord Dam, Pretoria | SI, WCE         | not detected     |              |                  |                         |
| BA 202    | 15-Feb-22 | Bon Accord Dam, Pretoria | SI, WCE         | not detected     |              |                  |                         |

|        |           |                            |                           |                  |                  |                  |                         |
|--------|-----------|----------------------------|---------------------------|------------------|------------------|------------------|-------------------------|
| BA 203 | 15-Feb-22 | Bon Accord Dam, Pretoria   | SI, WCE                   | not detected     |                  |                  |                         |
| BA 204 | 15-Feb-22 | Bon Accord Dam, Pretoria   | SI, WCE                   | not detected     |                  |                  |                         |
| BA 205 | 15-Feb-22 | Bon Accord Dam, Pretoria   | SI, WCE                   | not detected     |                  |                  |                         |
| BA 206 | 15-Feb-22 | Bon Accord Dam, Pretoria   | SI, WCE                   | not detected     |                  |                  |                         |
| KD 003 | 16-Feb-22 | Klipdrift Dam, Randfontein | WFD, SI                   | not detected     |                  |                  |                         |
| KD 001 | 16-Feb-22 | Klipdrift Dam, Randfontein | WFD, SI                   | not detected     |                  |                  |                         |
| KD 002 | 16-Feb-22 | Klipdrift Dam, Randfontein | WFD, SI                   | Positive (34.83) | not detected     | not detected     | <b>H3N1</b>             |
| ZL101  | 17-Feb-22 | Zoo Lake, Johannesburg     | EG, SI                    | not detected     |                  |                  |                         |
| ZL201  | 17-Feb-22 | Zoo Lake, Johannesburg     | EG, SI                    | not detected     |                  |                  |                         |
| ZL202  | 17-Feb-22 | Zoo Lake, Johannesburg     | EG, SI                    | not detected     |                  |                  |                         |
| ZL203  | 17-Feb-22 | Zoo Lake, Johannesburg     | EG, SI                    | not detected     |                  |                  |                         |
| ZL204  | 17-Feb-22 | Zoo Lake, Johannesburg     | EG, SI                    | Positive (33.55) | not detected     | not detected     |                         |
| ZL205  | 17-Feb-22 | Zoo Lake, Johannesburg     | EG, SI                    | Positive (37.08) | not detected     | not detected     |                         |
| ZL206  | 17-Feb-22 | Zoo Lake, Johannesburg     | EG, SI                    | Positive (34.96) | Positive (34.02) | not detected     | <b>H5N2<sup>b</sup></b> |
| ZL207  | 17-Feb-22 | Zoo Lake, Johannesburg     | EG, SI                    | not detected     |                  |                  |                         |
| ZL208  | 17-Feb-22 | Zoo Lake, Johannesburg     | EG, SI                    | not detected     |                  |                  |                         |
| ZL209  | 17-Feb-22 | Zoo Lake, Johannesburg     | EG, SI                    | not detected     |                  |                  |                         |
| ZL210  | 17-Feb-22 | Zoo Lake, Johannesburg     | EG, SI                    | Positive (37.80) | not detected     | not detected     |                         |
| ZL211  | 17-Feb-22 | Zoo Lake, Johannesburg     | EG, SI                    | Positive (36.91) | not detected     | not detected     |                         |
| ZL212  | 17-Feb-22 | Zoo Lake, Johannesburg     | EG, SI                    | not detected     |                  |                  |                         |
| ZL213  | 17-Feb-22 | Zoo Lake, Johannesburg     | EG, SI                    | Positive (33.95) | not detected     | Positive (36.44) | <b>H9N2<sup>b</sup></b> |
| ZL214  | 17-Feb-22 | Zoo Lake, Johannesburg     | EG, SI                    | not detected     |                  |                  |                         |
| ZL215  | 17-Feb-22 | Zoo Lake, Johannesburg     | EG, SI                    | not detected     |                  |                  |                         |
| ZK001  | 18-Feb-22 | Zeekoegat, Roodeplaat      | EG                        | Positive (37.73) | not detected     | not detected     |                         |
| ZK002  | 18-Feb-22 | Zeekoegat, Roodeplaat      | EG                        | not detected     |                  |                  |                         |
| ZK003  | 18-Feb-22 | Zeekoegat, Roodeplaat      | EG                        | not detected     |                  |                  |                         |
| ZL102  | 18-Feb-22 | Zoo Lake, Johannesburg     | EG, SI                    | not detected     |                  |                  |                         |
| BA301  | 22-Feb-22 | Bon Accord Dam, Pretoria   | EG, SI, EWS, SWG, BLP, BH | not detected     |                  |                  |                         |
| BA302  | 22-Feb-22 | Bon Accord Dam, Pretoria   | EG, SI, EWS, SWG, BLP, BH | not detected     |                  |                  |                         |
| BA303  | 22-Feb-22 | Bon Accord Dam, Pretoria   | EG, SI, EWS, SWG, BLP, BH | Positive (37.07) | Positive (36.95) | not detected     | <b>H5Nx<sup>c</sup></b> |

|        |           |                           |                           |                  |                  |                  |                              |
|--------|-----------|---------------------------|---------------------------|------------------|------------------|------------------|------------------------------|
| BA304  | 22-Feb-22 | Bon Accord Dam, Pretoria  | EG, SI, EWS, SWG, BLP, BH | not detected     |                  |                  |                              |
| BA305  | 22-Feb-22 | Bon Accord Dam, Pretoria  | EG, SI, EWS, SWG, BLP, BH | not detected     |                  |                  |                              |
| BA306  | 22-Feb-22 | Bon Accord Dam, Pretoria  | EG, SI, EWS, SWG, BLP, BH | not detected     |                  |                  |                              |
| BA307  | 22-Feb-22 | Bon Accord Dam, Pretoria  | EG, SI, EWS, SWG, BLP, BH | Positive (36.96) | not detected     | not detected     |                              |
| BA308  | 22-Feb-22 | Bon Accord Dam, Pretoria  | EG, SI, EWS, SWG, BLP, BH | not detected     |                  |                  |                              |
| BA309  | 22-Feb-22 | Bon Accord Dam, Pretoria  | EG, SI, EWS, SWG, BLP, BH | not detected     |                  |                  |                              |
| BA310  | 22-Feb-22 | Bon Accord Dam, Pretoria  | EG, SI, EWS, SWG, BLP, BH | not detected     |                  |                  |                              |
| TRF001 | 23-Feb-22 | Turffontein, Johannesburg | EWS, SI                   | Positive (29.29) | Positive (33.34) | not detected     | <b>H5N1 HPAI<sup>e</sup></b> |
| TRF002 | 23-Feb-22 | Turffontein, Johannesburg | EWS, SI                   | Positive (35.54) | not detected     | not detected     |                              |
| TRF003 | 23-Feb-22 | Turffontein, Johannesburg | EWS, SI                   | not detected     |                  |                  |                              |
| TRF004 | 23-Feb-22 | Turffontein, Johannesburg | EWS, SI                   | Positive (34.35) | not detected     | not detected     |                              |
| TRF005 | 23-Feb-22 | Turffontein, Johannesburg | EWS, SI                   | Positive (37.98) | not detected     | not detected     |                              |
| WPN001 | 23-Feb-22 | Wemmerpan, Johannesburg   | EG, SI                    | not detected     |                  |                  |                              |
| WPN002 | 23-Feb-22 | Wemmerpan, Johannesburg   | EG, SI                    | not detected     |                  |                  |                              |
| WPN003 | 23-Feb-22 | Wemmerpan, Johannesburg   | EG, SI                    | Positive (35.66) | not detected     | not detected     |                              |
| WPN004 | 23-Feb-22 | Wemmerpan, Johannesburg   | EG, SI                    | not detected     |                  |                  |                              |
| WPN005 | 23-Feb-22 | Wemmerpan, Johannesburg   | EG, SI                    | not detected     |                  |                  |                              |
| WPN006 | 23-Feb-22 | Wemmerpan, Johannesburg   | EG, SI                    | not detected     |                  |                  |                              |
| WPN007 | 23-Feb-22 | Wemmerpan, Johannesburg   | EG, SI                    | Positive (35.48) | not detected     | not detected     |                              |
| WPN008 | 23-Feb-22 | Wemmerpan, Johannesburg   | EG, SI                    | not detected     |                  |                  |                              |
| WPN009 | 23-Feb-22 | Wemmerpan, Johannesburg   | EG, SI                    | Positive (36.44) | not detected     | not detected     |                              |
| WPN010 | 23-Feb-22 | Wemmerpan, Johannesburg   | EG, SI                    | Positive (37.64) | not detected     | not detected     |                              |
| ZL301  | 23-Feb-22 | Zoo Lake, Johannesburg    | EG, SI                    | not detected     |                  |                  |                              |
| ZL302  | 23-Feb-22 | Zoo Lake, Johannesburg    | EG, SI                    | not detected     |                  |                  |                              |
| ZL303  | 23-Feb-22 | Zoo Lake, Johannesburg    | EG, SI                    | Positive (37.13) | not detected     | Positive (35.84) |                              |
| ZL304  | 23-Feb-22 | Zoo Lake, Johannesburg    | EG, SI                    | not detected     |                  |                  |                              |
| ZL305  | 23-Feb-22 | Zoo Lake, Johannesburg    | EG, SI                    | not detected     |                  |                  |                              |
| ZL306  | 23-Feb-22 | Zoo Lake, Johannesburg    | EG, SI                    | not detected     |                  |                  |                              |
| ZL307  | 23-Feb-22 | Zoo Lake, Johannesburg    | EG, SI                    | Positive (36.96) | not detected     | not detected     |                              |
| ZL308  | 23-Feb-22 | Zoo Lake, Johannesburg    | EG, SI                    | not detected     |                  |                  |                              |

|           |           |                             |                           |                  |              |                  |                           |
|-----------|-----------|-----------------------------|---------------------------|------------------|--------------|------------------|---------------------------|
| ZL309     | 23-Feb-22 | Zoo Lake, Johannesburg      | EG, SI                    | Positive (25.96) | not detected | Positive (26.01) | <b>H9N2<sup>b,c</sup></b> |
| ZL310     | 23-Feb-22 | Zoo Lake, Johannesburg      | EG, SI                    | Positive (35.28) | not detected | Positive (36.9)  | <b>H9N2</b>               |
| IRN24-001 | 24-Feb-22 | Irene, Centurion            | EG, YBD, SI, HI           | not detected     |              |                  |                           |
| IRN24-002 | 24-Feb-22 | Irene, Centurion            | EG, YBD, SI, HI           | not detected     |              |                  |                           |
| IRN24-003 | 24-Feb-22 | Irene, Centurion            | EG, YBD, SI, HI           | not detected     |              |                  |                           |
| IRN24-004 | 24-Feb-22 | Irene, Centurion            | EG, YBD, SI, HI           | not detected     |              |                  |                           |
| IRN24-005 | 24-Feb-22 | Irene, Centurion            | EG, YBD, SI, HI           | not detected     |              |                  |                           |
| IRN24-006 | 24-Feb-22 | Irene, Centurion            | EG, YBD, SI, HI           | not detected     |              |                  |                           |
| IRN24-007 | 24-Feb-22 | Irene, Centurion            | EG, YBD, SI, HI           | not detected     |              |                  |                           |
| IRN24-008 | 24-Feb-22 | Irene, Centurion            | EG, YBD, SI, HI           | not detected     |              |                  |                           |
| IRN24-009 | 24-Feb-22 | Irene, Centurion            | EG, YBD, SI, HI           | not detected     |              |                  |                           |
| IRN24-010 | 24-Feb-22 | Irene, Centurion            | EG, YBD, SI, HI           | not detected     |              |                  |                           |
| BA401     | 01-Mar-22 | Bon Accord Dam, Pretoria    | EG, SI, EWS, SWG, BLP, BH | not detected     |              |                  |                           |
| BA402     | 01-Mar-22 | Bon Accord Dam, Pretoria    | EG, SI, EWS, SWG, BLP, BH | not detected     |              |                  |                           |
| BA403     | 01-Mar-22 | Bon Accord Dam, Pretoria    | EG, SI, EWS, SWG, BLP, BH | Positive (36.91) | not detected | not detected     |                           |
| BA404     | 01-Mar-22 | Bon Accord Dam, Pretoria    | EG, SI, EWS, SWG, BLP, BH | not detected     |              |                  |                           |
| BA405     | 01-Mar-22 | Bon Accord Dam, Pretoria    | EG, SI, EWS, SWG, BLP, BH | not detected     |              |                  |                           |
| BA406     | 01-Mar-22 | Bon Accord Dam, Pretoria    | EG, SI, EWS, SWG, BLP, BH | not detected     |              |                  |                           |
| BA407     | 01-Mar-22 | Bon Accord Dam, Pretoria    | EG, SI, EWS, SWG, BLP, BH | not detected     |              |                  |                           |
| BA408     | 01-Mar-22 | Bon Accord Dam, Pretoria    | EG, SI, EWS, SWG, BLP, BH | not detected     |              |                  |                           |
| BA409     | 01-Mar-22 | Bon Accord Dam, Pretoria    | EG, SI, EWS, SWG, BLP, BH | not detected     |              |                  |                           |
| BA410     | 01-Mar-22 | Bon Accord Dam, Pretoria    | EG, SI, EWS, SWG, BLP, BH | not detected     |              |                  |                           |
| D3396-1   | 01-Mar-22 | Heidelberg Dump, Heidelberg | EG, SI                    | not detected     |              |                  |                           |
| D3396-2   | 01-Mar-22 | Heidelberg Dump, Heidelberg | EG, SI                    | not detected     |              |                  |                           |
| D3397-1   | 01-Mar-22 | Rooikraal, Heidelberg       | EG, SI                    | not detected     |              |                  |                           |
| D3397-2   | 01-Mar-22 | Rooikraal, Heidelberg       | EG, SI                    | not detected     |              |                  |                           |
| D3397-3   | 01-Mar-22 | Rooikraal, Heidelberg       | EG, SI                    | not detected     |              |                  |                           |
| D3398-1   | 02-Mar-22 | Klipdrift Dam, Randfontein  | WFD, SI EG                | not detected     |              |                  |                           |
| D3398-2   | 02-Mar-22 | Klipdrift Dam, Randfontein  | WFD, SI, EG               | not detected     |              |                  |                           |
| D3393     | 02-Mar-22 | Klipdrift Dam, Randfontein  | WFD, SI                   | Positive (35.13) | not detected | not detected     |                           |

|       |           |                          |                |                  |                  |                  |                         |
|-------|-----------|--------------------------|----------------|------------------|------------------|------------------|-------------------------|
| ZL401 | 04-Mar-22 | Zoo Lake, Johannesburg   | EG, SI         | not detected     |                  |                  |                         |
| ZL402 | 04-Mar-22 | Zoo Lake, Johannesburg   | EG, SI         | Positive (38.17) | not detected     | not detected     |                         |
| ZL403 | 04-Mar-22 | Zoo Lake, Johannesburg   | EG, SI         | Positive (37.0)  | not detected     | not detected     |                         |
| ZL404 | 04-Mar-22 | Zoo Lake, Johannesburg   | EG, SI         | not detected     |                  |                  |                         |
| ZL405 | 04-Mar-22 | Zoo Lake, Johannesburg   | EG, SI         | not detected     |                  |                  |                         |
| ZL406 | 04-Mar-22 | Zoo Lake, Johannesburg   | EG, SI         | Positive (36.83) | not detected     | not detected     |                         |
| ZL407 | 04-Mar-22 | Zoo Lake, Johannesburg   | EG, SI         | Positive (33.35) | not detected     | not detected     |                         |
| ZL408 | 04-Mar-22 | Zoo Lake, Johannesburg   | EG, SI         | Positive (35.26) | not detected     | not detected     |                         |
| ZL409 | 04-Mar-22 | Zoo Lake, Johannesburg   | EG, SI         | not detected     |                  |                  |                         |
| ZL410 | 04-Mar-22 | Zoo Lake, Johannesburg   | EG, SI         | Positive (35.29) | not detected     | Positive (36.64) | <b>H9N2</b>             |
| ZL411 | 04-Mar-22 | Zoo Lake, Johannesburg   | EG, SI         | not detected     |                  |                  |                         |
| BA501 | 09-Mar-22 | Bon Accord Dam, Pretoria | EG, SI, BH EWS | not detected     |                  |                  |                         |
| BA502 | 09-Mar-22 | Bon Accord Dam, Pretoria | EG, SI, BH EWS | not detected     |                  |                  |                         |
| BA503 | 09-Mar-22 | Bon Accord Dam, Pretoria | EG, SI, BH     | not detected     |                  |                  |                         |
| BA504 | 09-Mar-22 | Bon Accord Dam, Pretoria | EG, SI, BH     | not detected     |                  |                  |                         |
| BA505 | 09-Mar-22 | Bon Accord Dam, Pretoria | EG, SI, BH     | not detected     |                  |                  |                         |
| BA506 | 09-Mar-22 | Bon Accord Dam, Pretoria | EG, SI, BH     | not detected     |                  |                  |                         |
| BA507 | 09-Mar-22 | Bon Accord Dam, Pretoria | EG, SI, BH     | Positive (36.93) | not detected     | not detected     | <b>H4N2</b>             |
| BA508 | 09-Mar-22 | Bon Accord Dam, Pretoria | EG, SI, BH     | not detected     |                  |                  |                         |
| BA509 | 09-Mar-22 | Bon Accord Dam, Pretoria | EG, SI, BH     | not detected     |                  |                  |                         |
| BA510 | 09-Mar-22 | Bon Accord Dam, Pretoria | EG, SI, BH     | not detected     |                  |                  |                         |
| ZL501 | 11-Mar-22 | Zoo Lake, Johannesburg   | EG, SI, BH     | Positive (36.23) | not detected     | not detected     |                         |
| ZL502 | 11-Mar-22 | Zoo Lake, Johannesburg   | EG, SI, BH     | not detected     |                  |                  |                         |
| ZL503 | 11-Mar-22 | Zoo Lake, Johannesburg   | EG, SI, BH     | Positive (35.14) | not detected     | not detected     |                         |
| ZL504 | 11-Mar-22 | Zoo Lake, Johannesburg   | EG, SI, BH     | Positive (36.14) | not detected     | not detected     |                         |
| ZL505 | 11-Mar-22 | Zoo Lake, Johannesburg   | EG, SI, BH     | Positive (37.25) | not detected     | not detected     |                         |
| ZL506 | 11-Mar-22 | Zoo Lake, Johannesburg   | EG, SI, BH     | Positive (36.6)  | Positive (34.91) | not detected     | <b>H5N1<sup>d</sup></b> |
| ZL507 | 11-Mar-22 | Zoo Lake, Johannesburg   | EG, SI, BH     | Positive (38.01) | not detected     | not detected     |                         |
| ZL508 | 11-Mar-22 | Zoo Lake, Johannesburg   | EG, SI, BH     | Positive (35.87) | not detected     | not detected     |                         |
| ZL509 | 11-Mar-22 | Zoo Lake, Johannesburg   | EG, SI, BH     | Positive (36.84) | not detected     | not detected     |                         |

|         |           |                           |                           |                  |                  |                  |                         |
|---------|-----------|---------------------------|---------------------------|------------------|------------------|------------------|-------------------------|
| ZL510   | 11-Mar-22 | Zoo Lake, Johannesburg    | EG, SI, BH                | not detected     |                  |                  |                         |
| D4120-1 | 14-Mar-22 | Baja Dam, Bronkhorstspuit | EG, SI                    | Positive (36.76) | not detected     | not detected     |                         |
| D4120-2 | 14-Mar-22 | Baja Dam, Bronkhorstspuit | EG, SI                    | Positive (35.9)  | not detected     | not detected     |                         |
| BA601   | 15-Mar-22 | Bon Accord Dam, Pretoria  | EG, SI, BH, SWG, WCE, EWS | Positive (35.84) | not detected     | not detected     |                         |
| BA602   | 15-Mar-22 | Bon Accord Dam, Pretoria  | EG, SI, BH, SWG, WCE, EWS | Positive (36.86) | not detected     | not detected     |                         |
| BA603   | 15-Mar-22 | Bon Accord Dam, Pretoria  | EG, SI, BH, SWG, WCE, EWS | Positive (35.39) | not detected     | not detected     |                         |
| BA604   | 15-Mar-22 | Bon Accord Dam, Pretoria  | EG, SI, BH, SWG, WCE, EWS | Positive (35.81) | not detected     | not detected     |                         |
| BA605   | 15-Mar-22 | Bon Accord Dam, Pretoria  | EG, SI, BH, SWG, WCE, EWS | Positive (36.23) | not detected     | not detected     |                         |
| BA606   | 15-Mar-22 | Bon Accord Dam, Pretoria  | EG, SI, BH, SWG, WCE, EWS | Positive (35.35) | not detected     | not detected     |                         |
| BA607   | 15-Mar-22 | Bon Accord Dam, Pretoria  | EG, SI, BH, SWG, WCE, EWS | Positive (35.74) | not detected     | not detected     |                         |
| BA608   | 15-Mar-22 | Bon Accord Dam, Pretoria  | EG, SI, BH, SWG, WCE, EWS | not detected     |                  |                  |                         |
| BA609   | 15-Mar-22 | Bon Accord Dam, Pretoria  | EG, SI, BH, SWG, WCE, EWS | Positive (36.58) | not detected     | not detected     |                         |
| BA610   | 15-Mar-22 | Bon Accord Dam, Pretoria  | EG, SI, BH, SWG, WCE, EWS | Positive (36.33) | not detected     | not detected     |                         |
| BA611   | 15-Mar-22 | Bon Accord Dam, Pretoria  | EG, SI, BH, SWG, WCE, EWS | Positive (36.56) | Positive (35.86) | not detected     | <b>H5N1<sup>d</sup></b> |
| BA612   | 15-Mar-22 | Bon Accord Dam, Pretoria  | EG, SI, BH, SWG, WCE, EWS | Positive (37.27) | not detected     | not detected     |                         |
| BA613   | 15-Mar-22 | Bon Accord Dam, Pretoria  | EG, SI, BH, SWG, WCE, EWS | Positive (34.86) | not detected     | not detected     |                         |
| D4121-1 | 15-Mar-22 | Loch Vaal, Vereeniging    | EG                        | Positive (36.6)  | not detected     | not detected     |                         |
| D4121-2 | 15-Mar-22 | Loch Vaal, Vereeniging    | EG                        | Positive (37.39) | not detected     | not detected     |                         |
| ZL601   | 18-Mar-22 | Zoo Lake, Johannesburg    | EG, SI                    | not detected     |                  |                  |                         |
| ZL602   | 18-Mar-22 | Zoo Lake, Johannesburg    | EG, SI                    | not detected     |                  |                  |                         |
| ZL603   | 18-Mar-22 | Zoo Lake, Johannesburg    | EG, SI                    | Positive (37.83) | not detected     | not detected     |                         |
| ZL604   | 18-Mar-22 | Zoo Lake, Johannesburg    | EG, SI                    | not detected     |                  |                  |                         |
| ZL605   | 18-Mar-22 | Zoo Lake, Johannesburg    | EG, SI                    | Positive (36.61) | not detected     | not detected     |                         |
| ZL606   | 18-Mar-22 | Zoo Lake, Johannesburg    | EG, SI                    | not detected     |                  |                  |                         |
| ZL607   | 18-Mar-22 | Zoo Lake, Johannesburg    | EG, SI                    | not detected     |                  |                  |                         |
| ZL608   | 18-Mar-22 | Zoo Lake, Johannesburg    | EG, SI                    | not detected     |                  |                  |                         |
| ZL609   | 18-Mar-22 | Zoo Lake, Johannesburg    | EG, SI                    | Positive (37.15) | not detected     | not detected     |                         |
| D4383-1 | 22-Mar-22 | Wemmerpan, Johannesburg   | EG                        | Positive (37.06) | not detected     | not detected     |                         |
| D4383-2 | 22-Mar-22 | Wemmerpan, Johannesburg   | SI                        | Positive (35.86) | not detected     | not detected     |                         |
| D5513-1 | 19-Apr-22 | Loch Vaal, Vereeniging    | EG                        | Positive (35.08) | not detected     | Positive (35.93) | <b>H9N2</b>             |

|         |           |                                 |             |                  |                  |                 |                         |
|---------|-----------|---------------------------------|-------------|------------------|------------------|-----------------|-------------------------|
| D5513-2 | 19-Apr-22 | Loch Vaal, Vereeniging          | EG          | Positive (34.93) | Positive (36.96) | not detected    | <b>H5Nx<sup>d</sup></b> |
| D5514-1 | 20-Apr-22 | Klipdrift Dam, Randfontein      | WFD, SI EG  | Not detected     |                  |                 |                         |
| D5514-2 | 20-Apr-22 | Klipdrift Dam, Randfontein      | WFD, SI, EG | Not detected     |                  |                 |                         |
| D5648-1 | 21-Apr-22 | Leeukop Prison Dam, Randfontein | WFD, SI     | Positive (36.86) | not detected     | not detected    |                         |
| D5648-2 | 21-Apr-22 | Leeukop Prison Dam, Randfontein | WFD, SI     | Positive (34.64) | not detected     | not detected    |                         |
| D6166-1 | 03-May-22 | Klipdrift Dam, Randfontein      | WFD, SI, EG | not detected     |                  |                 |                         |
| D6166-2 | 03-May-22 | Klipdrift Dam, Randfontein      | WFD, SI, EG | Positive (36.05) | not detected     | not detected    |                         |
| D6167-1 | 04-May-22 | Log Vaal, Vereeniging           | EG          | not detected     |                  |                 |                         |
| D6167-2 | 04-May-22 | Log Vaal, Vereeniging           | EG          | not detected     |                  |                 |                         |
| D6540   | 09-May-22 | Heidelberg Dump, Heidelberg     | EG, SI      | not detected     |                  |                 |                         |
| D6539-1 | 09-May-22 | Rooikraal, Heidelberg           | EG, SI      | not detected     |                  |                 |                         |
| D6539-2 | 09-May-22 | Rooikraal, Heidelberg           | EG, SI      | Positive (36.71) | not detected     | Positive (37.0) | <b>H9N2</b>             |
| D6541-1 | 11-May-22 | Leeukop Prison Dam, Randfontein | WFD, SI     | not detected     |                  |                 |                         |
| D6541-2 | 11-May-22 | Leeukop Prison Dam, Randfontein | WFD, SI     | not detected     |                  |                 |                         |
| D6541-3 | 11-May-22 | Leeukop Prison Dam, Randfontein | WFD, SI     | not detected     |                  |                 |                         |
| D7021-1 | 12-May-22 | Turffontein, Johannesburg       | EG, SI      | not detected     |                  |                 |                         |
| D7021-2 | 12-May-22 | Turffontein, Johannesburg       | EG, SI      | not detected     |                  |                 |                         |
| D7019-1 | 16-May-22 | Baja Dam, Bronkhorstspuit       | EG, SI      | Positive (35.53) | not detected     | not detected    |                         |
| D7019-2 | 16-May-22 | Baja Dam, Bronkhorstspuit       | EG, SI      | not detected     |                  |                 |                         |
| D7020-1 | 17-May-22 | Grootvaly, Springs              | SI, EG, WFD | Positive (37.16) | not detected     | not detected    |                         |
| D7020-2 | 17-May-22 | Grootvaly, Springs              | SI, EG, WFD | Positive (35.77) | not detected     | not detected    |                         |
| D7021-1 | 12-May-22 | Turffontein, Johannesburg       | EG, SI, EWS | not detected     |                  |                 |                         |
| D7021-2 | 12-May-22 | Turffontein, Johannesburg       | EG, SI EWS  | not detected     |                  |                 |                         |
| D7427-1 | 30-May-22 | Zoo Lake, Johannesburg          | EG, SI      | Positive (35.68) | not detected     | not detected    |                         |
| D7427-2 | 30-May-22 | Zoo Lake, Johannesburg          | EG, SI      | Positive (36.18) | not detected     | not detected    |                         |

<sup>a</sup>Non- H5/H9 H and -N subtypes determined by subtype-specific SYBR green r RT-PCRs; <sup>b</sup>Complete genome sequence; <sup>c</sup>Virus isolated in cell culture or eggs; <sup>d</sup>Pathotype could not be determined; <sup>e</sup>Sanger DNA sequencing of HA<sub>0</sub>=PLREKRRKRGLF; EG- Egyptian Goose, SI-Sacred Ibis, HI- Hadeda Ibis, YBD- Yellow-Billed Duck, WFD- White Faced Duck, EWS- European White Stork, WCE- Western Cattle Egret, SWG- Spur-Winged Goose, BL- Blacksmith Lapwing Plover, BH- Black Heron, sampled from a moribund bird\* or carcass\*\*
