# Supplementary material for: Wild Bird Surveillance in the Gauteng Province of South Africa during the High-Risk Period for Highly Pathogenic Avian Influenza Virus Introduction
Source: MDPI journal article supplement (doi:10.3390/v14092027), 2022-09-13
Supplement: s1 [file s1]

**Supplemental Table S2. tMRCA analysis**

| Gene                               | Node (X)                              | Node age | 95 % HPD           | Posterior probability |
|------------------------------------|---------------------------------------|----------|--------------------|-----------------------|
| <b>PB2</b>                         | A/wild duck/ZL117/2022 (H9N2)         |          |                    |                       |
|                                    | X                                     |          |                    |                       |
|                                    | A/wild ducks/ZA/ ZL118/2022 (H9N2)    | Jul 2021 | Dec 2020-Dec 2021  | 1                     |
|                                    | A/wild ducks/ZA/ ZL121/2022 (H9N2)    |          |                    |                       |
|                                    | A/wild ducks/ZA/ ZL213/2022 (H9N2)    |          |                    |                       |
| <b>PB2</b>                         | A/wild ducks/ZA/ ZL309/2022 (H9N2)    |          |                    |                       |
|                                    | A/wild duck/ZL117/2022 (H9N2)         |          |                    |                       |
|                                    | A/wild ducks/ZA/ ZL118/2022 (H9N2)    | Jul 2019 | Aug 2018-Mar 2020  | 1                     |
|                                    | A/wild ducks/ZA/ ZL121/2022 (H9N2)    |          |                    |                       |
|                                    | A/wild ducks/ZA/ ZL213/2022 (H9N2)    |          |                    |                       |
| <b>PB2</b>                         | A/wild ducks/ZA/ ZL309/2022 (H9N2)    |          |                    |                       |
|                                    | X                                     |          |                    |                       |
|                                    | A/ostrich/ZA/090581/2020 (H5N2)       |          |                    |                       |
|                                    | A/wild duck/ZL117/2022 (H9N2)         | Feb 2018 | May 2017-Nov 2018  | 0.39                  |
|                                    | A/wild ducks/ZA/ ZL118/2022 (H9N2)    |          |                    |                       |
| <b>PB2</b>                         | A/wild ducks/ZA/ ZL121/2022 (H9N2)    |          |                    |                       |
|                                    | A/wild ducks/ZA/ ZL213/2022 (H9N2)    |          |                    |                       |
|                                    | A/wild ducks/ZA/ ZL309/2022 (H9N2)    |          |                    |                       |
|                                    | A/ostrich/ZA/090581/2020 (H5N2)       |          |                    |                       |
|                                    | A/ostrich/ZA/18090431/2018 (H11N1)    |          |                    |                       |
| <b>PB2</b>                         | X                                     |          |                    |                       |
|                                    | A/ostrich/ZA/543-31/2019 (H11N1)      | Apr 2018 | Nov 2017- Aug 2018 | 0.79                  |
|                                    | A/ostrich/ZA/543-20/2019 (H11N1)      |          |                    |                       |
|                                    | A/ostrich/ZA/543-26/2019 (H11N1)      |          |                    |                       |
|                                    | A/ostrich/ZA/543-17/2019 (H11N1)      |          |                    |                       |
| <b>PB2</b>                         | A/ostrich/ZA/0107-21/2019 (H11N1)     |          |                    |                       |
|                                    | A/ostrich/ZA/0107-23/2019 (H11N1)     |          |                    |                       |
|                                    | A/mallard/ZA/0156-38/2019 (H11N9)     |          |                    |                       |
|                                    | X                                     |          |                    |                       |
|                                    | A/wild duck/ZL117/2022 (H9N2)         |          |                    |                       |
|                                    | A/wild ducks/ZA/ ZL118/2022 (H9N2)    |          |                    |                       |
|                                    | A/wild ducks/ZA/ ZL121/2022 (H9N2)    |          |                    |                       |
|                                    | A/wild ducks/ZA/ ZL213/2022 (H9N2)    |          |                    |                       |
|                                    | A/wild ducks/ZA/ ZL309/2022 (H9N2)    |          |                    |                       |
|                                    | A/wild duck/ZL117/2022 (H9N2)         |          |                    |                       |
|                                    | A/wild ducks/ZA/ ZL118/2022 (H9N2)    | Jan 2017 | Feb 2016-Feb 2018  | 1                     |
|                                    | A/wild ducks/ZA/ ZL121/2022 (H9N2)    |          |                    |                       |
|                                    | A/wild ducks/ZA/ ZL213/2022 (H9N2)    |          |                    |                       |
|                                    | A/wild ducks/ZA/ ZL309/2022 (H9N2)    |          |                    |                       |
|                                    | A/ostrich/ZA/090581/2020 (H5N2)       |          |                    |                       |
| A/ostrich/ZA/18090431/2018 (H11N1) |                                       |          |                    |                       |
| A/ostrich/ZA/543-31/2019 (H11N1)   |                                       |          |                    |                       |
| A/ostrich/ZA/543-20/2019 (H11N1)   |                                       |          |                    |                       |
| A/ostrich/ZA/543-26/2019 (H11N1)   |                                       |          |                    |                       |
| A/ostrich/ZA/543-17/2019 (H11N1)   |                                       |          |                    |                       |
| A/ostrich/ZA/0107-21/2019 (H11N1)  |                                       |          |                    |                       |
| A/ostrich/ZA/0107-23/2019 (H11N1)  |                                       |          |                    |                       |
| <b>PB2</b>                         | A/pintail/Egypt/MB-D-384C/2015 (H3N6) | May 2015 | Nov 2014-Sep 2015  | 0.4                   |
|                                    | X                                     |          |                    |                       |
| <b>PB1</b>                         | All ZA viruses above (PB2 gene)       |          |                    |                       |
|                                    | A/wild duck/ZL117/2022 (H9N2)         |          |                    |                       |
|                                    | A/wild ducks/ZA/ ZL118/2022 (H9N2)    | Nov 2011 | Apr 2005-May 2016  | 0.35                  |
|                                    | A/wild ducks/ZA/ ZL121/2022 (H9N2)    |          |                    |                       |
|                                    | A/wild ducks/ZA/ ZL213/2022 (H9N2)    |          |                    |                       |

|           |                                                                                                                                                                                                                                                                                                                                                      |          |                    |   |
|-----------|------------------------------------------------------------------------------------------------------------------------------------------------------------------------------------------------------------------------------------------------------------------------------------------------------------------------------------------------------|----------|--------------------|---|
|           | A/wild ducks/ZA/ ZL309/2022 (H9N2)<br>X<br>A/Common Teal/Buryatia/89i/2019 (H11N1)<br>A/Duck/Mongolia/2019-496/2019 (H11N1)                                                                                                                                                                                                                          |          |                    |   |
| <b>PA</b> | A/wild duck/ZL117/2022 (H9N2)<br>A/wild ducks/ZA/ ZL118/2022 (H9N2)<br>A/wild ducks/ZA/ ZL121/2022 (H9N2)<br>A/wild ducks/ZA/ ZL213/2022 (H9N2)<br>A/wild ducks/ZA/ ZL309/2022 (H9N2)<br>X<br>A/ostrich/ZA/070595/2020 (H7N1)<br>A/ostrich/ZA/080067/2020 (H7N1)<br>A/ostrich/ZA/653561/2020 (H7N1)                                                  | Apr 2019 | Jun 2018-Feb 2020  | 1 |
| <b>PA</b> | A/wild duck/ZL117/2022 (H9N2)<br>A/wild ducks/ZA/ ZL118/2022 (H9N2)<br>A/wild ducks/ZA/ ZL121/2022 (H9N2)<br>A/wild ducks/ZA/ ZL213/2022 (H9N2)<br>A/wild ducks/ZA/ ZL309/2022 (H9N2)<br>A/ostrich/ZA/070595/2020 (H7N1)<br>A/ostrich/ZA/080067/2020 (H7N1)<br>A/ostrich/ZA/653561/2020 (H7N1)<br>X<br>A/mallard/Novosibirsk region/988k/2018 (H4N6) | Apr 2017 | Mar 2016-May 2018  | 1 |
| <b>HA</b> | A/wild duck/ZL117/2022 (H9N2)<br>A/wild ducks/ZA/ ZL118/2022 (H9N2)<br>A/wild ducks/ZA/ ZL121/2022 (H9N2)<br>A/wild ducks/ZA/ ZL213/2022 (H9N2)<br>A/wild ducks/ZA/ ZL309/2022 (H9N2)<br>X<br>A/Egyptian goose/ZA/TP2118/2021 (H9N2)                                                                                                                 | Feb 2019 | Dec 2015- Dec 2020 | 1 |
| <b>HA</b> | A/wild duck/ZL117/2022 (H9N2)<br>A/wild ducks/ZA/ ZL118/2022 (H9N2)<br>A/wild ducks/ZA/ ZL121/2022 (H9N2)<br>A/wild ducks/ZA/ ZL213/2022 (H9N2)<br>A/wild ducks/ZA/ ZL309/2022 (H9N2)<br>A/Egyptian goose/ZA/TP2118/2021 (H9N2)<br>X<br>A/pheasant/Italy/21 VIR2284-1/2021 (H9N2)                                                                    | Jan 2013 | Nov 2005-Feb 2020  | 1 |
| <b>NP</b> | A/wild duck/ZL117/2022 (H9N2)<br>A/wild ducks/ZA/ ZL118/2022 (H9N2)<br>A/wild ducks/ZA/ ZL121/2022 (H9N2)<br>A/wild ducks/ZA/ ZL213/2022 (H9N2)<br>A/wild ducks/ZA/ ZL309/2022 (H9N2)<br>A/Egyptian goose/ZA/TP2118/2021 (H9N2)<br>X<br>A/Egyptian goose/ZA/TP2118/2021 (H9N2)                                                                       | Oct 2018 | Apr 2017-Dec 2019  | 1 |
| <b>NP</b> | A/ostrich/ZA/18090431/2018 (H11N1)<br>X<br>A/ostrich/ZA/543-31/2019 (H11N1)<br>A/ostrich/ZA/543-20/2019 (H11N1)<br>A/ostrich/ZA/543-26/2019 (H11N1)<br>A/ostrich/ZA/543-17/2019 (H11N1)<br>A/ostrich/ZA/0107-21/2019 (H11N1)<br>A/ostrich/ZA/0107-23/2019 (H11N1)                                                                                    | Jul 2018 | Mar 2018-Aug 2018  | 1 |
| <b>NP</b> | A/wild duck/ZL117/2022 (H9N2)<br>A/wild ducks/ZA/ ZL118/2022 (H9N2)<br>A/wild ducks/ZA/ ZL121/2022 (H9N2)<br>A/wild ducks/ZA/ ZL213/2022 (H9N2)<br>A/wild ducks/ZA/ ZL309/2022 (H9N2)<br>A/Egyptian goose/ZA/TP2118/2021 (H9N2)<br>X                                                                                                                 | Jun 2015 | Feb 2014-Dec 2016  | 1 |

|           |                                                                                                                                                                                                                                                                                                                                                                                                                                                                                                                                                             |          |                   |      |
|-----------|-------------------------------------------------------------------------------------------------------------------------------------------------------------------------------------------------------------------------------------------------------------------------------------------------------------------------------------------------------------------------------------------------------------------------------------------------------------------------------------------------------------------------------------------------------------|----------|-------------------|------|
|           | A/ostrich/ZA/18090431/2018 (H11N1)<br>A/ostrich/ZA/543-31/2019 (H11N1)<br>A/ostrich/ZA/543-20/2019 (H11N1)<br>A/ostrich/ZA/543-26/2019 (H11N1)<br>A/ostrich/ZA/543-17/2019 (H11N1)<br>A/ostrich/ZA/0107-21/2019 (H11N1)<br>A/ostrich/ZA/0107-23/2019 (H11N1)                                                                                                                                                                                                                                                                                                |          |                   |      |
| <b>NP</b> | A/wild duck/ZL117/2022 (H9N2)<br>A/wild ducks/ZA/ ZL118/2022 (H9N2)<br>A/wild ducks/ZA/ ZL121/2022 (H9N2)<br>A/wild ducks/ZA/ ZL213/2022 (H9N2)<br>A/wild ducks/ZA/ ZL309/2022 (H9N2)<br>A/Egyptian goose/ZA/TP2118/2021 (H9N2)<br>A/ostrich/ZA/18090431/2018 (H11N1)<br>A/ostrich/ZA/543-31/2019 (H11N1)<br>A/ostrich/ZA/543-20/2019 (H11N1)<br>A/ostrich/ZA/543-26/2019 (H11N1)<br>A/ostrich/ZA/543-17/2019 (H11N1)<br>A/ostrich/ZA/0107-21/2019 (H11N1)<br>A/ostrich/ZA/0107-23/2019 (H11N1)<br>X<br>A/Anas platyrhynchos/Belgium/17330cls42/2013 (H5N2) | Feb 2012 | Mar 2011-Dec 2013 | 0.12 |
| <b>NA</b> | A/wild duck/ZL117/2022 (H9N2)<br>A/wild ducks/ZA/ ZL118/2022 (H9N2)<br>A/wild ducks/ZA/ ZL121/2022 (H9N2)<br>A/wild ducks/ZA/ ZL213/2022 (H9N2)<br>A/wild ducks/ZA/ ZL309/2022 (H9N2)<br>A/Egyptian goose/ZA/TP2118/2021 (H9N2)<br>X<br>A/Egyptian goose/ZA/TP2118/2021 (H9N2)                                                                                                                                                                                                                                                                              | Jun 2018 | Feb 2017-Dec 2019 | 1    |
| <b>NA</b> | /wild duck/ZL117/2022 (H9N2)<br>A/wild ducks/ZA/ ZL118/2022 (H9N2)<br>A/wild ducks/ZA/ ZL121/2022 (H9N2)<br>A/wild ducks/ZA/ ZL213/2022 (H9N2)<br>A/wild ducks/ZA/ ZL309/2022 (H9N2)<br>A/Egyptian goose/ZA/TP2118/2021 (H9N2)<br>X<br>A/wild bird/Uganda/MUWRP-731/2017 (H6N2)                                                                                                                                                                                                                                                                             | May 2016 | Jan 2015-Aug 2017 | 1    |
| <b>M</b>  | A/wild duck/ZL117/2022 (H9N2)<br>A/wild ducks/ZA/ ZL118/2022 (H9N2)<br>A/wild ducks/ZA/ ZL121/2022 (H9N2)<br>A/wild ducks/ZA/ ZL213/2022 (H9N2)<br>A/wild ducks/ZA/ ZL309/2022 (H9N2)<br>A/Egyptian goose/ZA/TP2118/2021 (H9N2)<br>X<br>A/Egyptian goose/ZA/TP2118/2021 (H9N2)                                                                                                                                                                                                                                                                              | Sep 2020 | Feb 2020-Feb 2021 | 1    |
| <b>M</b>  | A/ostrich/ZA/18090431/2018 (H11N1)<br>X<br>A/ostrich/ZA/543-31/2019 (H11N1)<br>A/ostrich/ZA/543-20/2019 (H11N1)<br>A/ostrich/ZA/543-26/2019 (H11N1)<br>A/ostrich/ZA/543-17/2019 (H11N1)<br>A/ostrich/ZA/0107-21/2019 (H11N1)<br>A/ostrich/ZA/0107-23/2019 (H11N1)                                                                                                                                                                                                                                                                                           | May 2018 | Dec 2017-Aug 2018 | 0.9  |
| <b>M</b>  | A/wild duck/ZL117/2022 (H9N2)<br>A/wild ducks/ZA/ ZL118/2022 (H9N2)<br>A/wild ducks/ZA/ ZL121/2022 (H9N2)<br>A/wild ducks/ZA/ ZL213/2022 (H9N2)<br>A/wild ducks/ZA/ ZL309/2022 (H9N2)<br>A/Egyptian goose/ZA/TP2118/2021 (H9N2)<br>X                                                                                                                                                                                                                                                                                                                        | Feb 2018 | May 2017-Aug 2018 | 1    |

|           |                                                                                                                                                                                                                                                                                                                                                                                             |          |                   |      |
|-----------|---------------------------------------------------------------------------------------------------------------------------------------------------------------------------------------------------------------------------------------------------------------------------------------------------------------------------------------------------------------------------------------------|----------|-------------------|------|
|           | A/ostrich/ZA/18090431/2018 (H11N1)<br>A/ostrich/ZA/543-31/2019 (H11N1)<br>A/ostrich/ZA/543-20/2019 (H11N1)<br>A/ostrich/ZA/543-26/2019 (H11N1)<br>A/ostrich/ZA/543-17/2019 (H11N1)<br>A/ostrich/ZA/0107-21/2019 (H11N1)<br>A/ostrich/ZA/0107-23/2019 (H11N1)                                                                                                                                |          |                   |      |
| <b>M</b>  | All ZA viruses above (M gene)<br>X<br>A/mallard/Dagestan/1051/2018 (H7N3)                                                                                                                                                                                                                                                                                                                   | May 2017 | Jul 2016-Feb 2018 | 1    |
| <b>NS</b> | A/wild duck/ZL117/2022 (H9N2)<br>A/wild ducks/ZA/ ZL118/2022 (H9N2)<br>A/wild ducks/ZA/ ZL121/2022 (H9N2)<br>A/wild ducks/ZA/ ZL213/2022 (H9N2)<br>A/wild ducks/ZA/ ZL309/2022 (H9N2)<br>A/Egyptian goose/ZA/TP2118/2021 (H9N2)<br>X<br>A/Egyptian goose/ZA/TP2118/2021 (H9N2)                                                                                                              | Sep 2020 | Nov 2019-Feb 2021 | 1    |
| <b>NS</b> | A/wild duck/ZL117/2022 (H9N2)<br>A/wild ducks/ZA/ ZL118/2022 (H9N2)<br>A/wild ducks/ZA/ ZL121/2022 (H9N2)<br>A/wild ducks/ZA/ ZL213/2022 (H9N2)<br>A/wild ducks/ZA/ ZL309/2022 (H9N2)<br>A/Egyptian goose/ZA/TP2118/2021 (H9N2)<br>X<br>A/ostrich/ZA/070595/2020 (H7N1)<br>A/ostrich/ZA/080067/2020 (H7N1)<br>A/ostrich/ZA/653561/2020 (H7N1)                                               | Sep 2018 | Dec 2016-Sep 2019 | 1    |
| <b>NS</b> | A/wild duck/ZL117/2022 (H9N2)<br>A/wild ducks/ZA/ ZL118/2022 (H9N2)<br>A/wild ducks/ZA/ ZL121/2022 (H9N2)<br>A/wild ducks/ZA/ ZL213/2022 (H9N2)<br>A/wild ducks/ZA/ ZL309/2022 (H9N2)<br>A/Egyptian goose/ZA/TP2118/2021 (H9N2)<br>A/ostrich/ZA/070595/2020 (H7N1)<br>A/ostrich/ZA/080067/2020 (H7N1)<br>A/ostrich/ZA/653561/2020 (H7N1)<br>X<br>A/mallard/Ukraine/AN-221-13-01/2020 (H7N2) | Aug 2016 | Dec 2014-Jun 2018 | 0.99 |
